# Geographical and seasonal changes of the prey species of minke whale in the Northwestern Pacific

Tsutomu Tamura and Yoshihiro Fujise

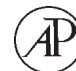

Tamura, T., and Fujise, Y. 2002. Geographical and seasonal changes of the prey species of minke whale in the Northwestern Pacific. – ICES Journal of Marine Science, 59: 516–528.

The forestomach contents of 498 minke whales *Balaenoptera acutorostrata* sampled in the Northwestern Pacific from May to September through the 1994–1999 JARPN surveys, were analysed. Sixteen prey species consisting of 1 copepod, 4 euphausiids, 1 squid, and 10 fishes were identified. The minke whale in the Northwestern Pacific is a swallowing, feeding-type species. It feeds on swarming zooplankton and schooling fishes, suggesting that minke whales pursue single prey-species aggregations. The results showed geographical and seasonal changes of prey species. On the Pacific side of Japan, Japanese anchovy was the most important prey species in May and June, while Pacific saury was most important in July and August. Walleye pollock was also an important prey species during June and September in coastal waters, over the continental shelf. In the southern Okhotsk Sea krill was the most important prey species in July and August. These changes probably reflect changes in the availability of the prey species in these areas. It would seem that there might be direct competition between minke whales and the fishery for Pacific saury.

© 2002 International Council for the Exploration of the Sea. Published by Elsevier Science Ltd. All rights reserved.

Keywords: minke whale, prey species, geographical change, seasonal change, North Pacific.

Received 23 April 2001; accepted 7 January 2002.

T. Tamura, and Y. Fujise: *The Institute of Cetacean Research, 4–18 Toyomi-cho, Chuo-ku, Tokyo 104-0055, Japan. Correspondence to T. Tamura: tel: +81 3 3536 6521; fax: +81 3 3536 6522; e-mail: tamura@i-cetacean-r.or.jp*

## Introduction

The minke whale *Balaenoptera acutorostrata* is widely distributed in the world. In the western North Pacific two stocks have been recognized: one in the Sea of Japan–Yellow Sea–East China Sea (J stock) and the other in the Okhotsk Sea–West Pacific (O stock) (IWC, 1983). The abundance of minke whales was estimated to be 19 209 animals with 95% confidence interval (10 069–36 645) in the Okhotsk Sea and 5841 animals with 95% confidence interval (2835–12 032) in the Northwest Pacific during August and September in 1989 and 1990 (Buckland *et al.*, 1992).

In the western North Pacific, minke whales are opportunistic feeders with a broad diet and with flexible feeding habits. According to previous reports they consume several fish species and their prey consumption is huge (Omura and Sakiura, 1956; Tomilin, 1967; Zhongxue *et al.*, 1983; Kasamatsu and Hata, 1985; Kasamatsu and Tanaka, 1992; Tamura *et al.*, 1998).

They seem to play an important role in the food web from spring to autumn. To understand their role in the marine ecosystem in Northwest Pacific, it is necessary to obtain more information, both qualitative and quantitative, of their feeding habits. However, there have been few published reports on this topic in the last decade. Furthermore, quantitative data on stomach contents has been lacking.

The “Japanese Whale Research Program under Special Permit in the Western North Pacific” (JARPN) began in 1994 in order to elucidate the stock structure of the western North Pacific minke whale. In 1996, the new objective of studying the feeding ecology was added with data on this subject being gathered from this year.

In this study, the geographical and seasonal changes of prey species and prey size based on the forestomach contents of 498 minke whales collected under JARPN auspices from spring to autumn in the period 1994–1999 were examined.

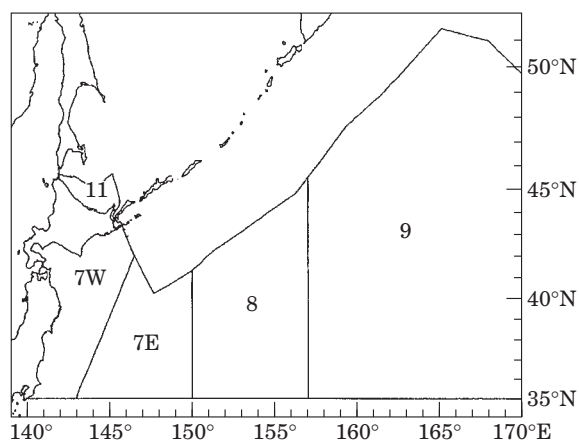

Figure 1. Subareas surveyed by the JARPN cruises between 1994 and 1999. Subareas based on IWC (1994), excluding the EEZ of Russia. Furthermore, subarea 7 was divided into east (7E) and west (7W).

Table 1. Subareas, months and years of surveys and sample size used in this study.

| Subarea | Survey month | Year       | Sample size |
|---------|--------------|------------|-------------|
| 7W      | June         | 1999       | 50          |
|         | August       | 1996       | 15          |
|         | September    | 1996       | 15          |
| 7E      | May          | 1998       | 56          |
|         | June         | 1997       | 2           |
|         | July         | 1996       | 1           |
| 8       | May          | 1998       | 8           |
|         | June         | 1998       | 36          |
|         | July         | 1996, 1997 | 42          |
|         | August       | 1996       | 5           |
| 9       | May          | 1997       | 27          |
|         | June         | 1995, 1997 | 54          |
|         | July         | 1994, 1995 | 69          |
|         | August       | 1994, 1995 | 34          |
| 11      | September    | 1994       | 4           |
|         | July         | 1999       | 50          |
|         | August       | 1996       | 30          |
| Total   |              |            | 498         |

## Materials and methods

### Sampling of whales

The minke whales were sampled in subareas 7, 8, 9, and 11 – excluding the EEZ of foreign countries – which were established by the IWC (IWC, 1994). Furthermore, subarea 7 was divided into east (7E) and west (7W) (Figure 1). Table 1 shows the months, year and number of samples in each subarea. Sampled whales were transported immediately to a research vessel, where biological measurements and sampling was carried out. To randomize the sampling a searching procedure for

whales along randomly predetermined transects within each sub area was used (Kato *et al.*, 1989). When a whale was observed during the survey, every effort was made to catch it regardless of problems encountered. The transects were designed in saw-tooth patterns. However, to improve the efficiency of the search operations, a certain degree of freedom allowed the modification of transect lines during the course of operations, depending on factors such as bad weather conditions.

The whales were sampled using one research vessel ('Nisshin Maru') and two or three sighting/sampling vessels ('Kyo Maru No.1', 'Toshi Maru No.25' and 'Toshi Maru No.18' or 'Yushin Maru').

### Sampling of stomach contents

Minke whales have a four-chambered stomach system (Hosokawa and Kamiya, 1971; Olsen *et al.*, 1994). Once the whale was on the research base vessel's upper deck the four stomachs were removed within 8 h of capture. Then each stomach content (including and excluding liquid respectively) was weighed to the nearest 0.1 kg. The forestomach content has proved sufficient for the determination of minke whale diet in the Northeast Atlantic because it contains the least digested and most easily identifiable prey remains (Lindström *et al.*, 1997). The prey composition of forestomach and fundus was very similar and therefore this study was based on contents from the forestomach only.

In the 1994 and 1995 JARPN surveys, a sub-sample (3–4 kg) of the content was removed and frozen and/or fixed with 10% formalin water for later analyses. From 1996 onwards, forestomach contents were transferred to a system consisting of three sieves (20 mm, 5 mm, and 1 mm) which is used by Norwegian fisheries' scientists to filter off liquid from the rest of the material (Haug *et al.*, 1995). From the same year also a sub-sample of 3–4 kg that included all undigested fish skulls, free otoliths and squid beaks, was frozen for later analysis in the laboratory.

Of the 498 minke whales sampled 46 stomachs had been destroyed by the harpoon, and their contents were lost whilst a further 26 stomachs were empty. Hence this analysis is based on 426 forestomach contents.

### Observation on stomach-contents samples

In the laboratory prey species in the sub-samples were identified to the lowest taxonomic level possible. Undigested preys were identified using morphological characteristics, copepods (Brodskii, 1950), euphausiids (Baker *et al.*, 1990), squids (Kubodera and Furuhashi, 1987) and fish (Masuda *et al.*, 1988; Chihara and Murano, 1997). The otoliths or jaw plate were used to identify the fish or squid in an advanced stage of

digestion (Morrow, 1979; Ohe, 1984; Kubodera and Furuhashi, 1987; Arai, 1993).

When undigested fish or squid were found, fork-length, mantlelength or the weights were measured to the nearest mm and g, respectively.

The total number of each fish and squid species in the sub-sample was determined by summing the number of undigested fish and squid, undigested skulls and, because, otoliths are paired, half the total number of free otoliths. The total weight by species in the sub-sample was estimated by multiplying the average body weight of undigested specimens by the number of individuals. The total number and weight by species in the forestomach were estimated by using the figures obtained from the sub-sample and the total weight of forestomach contents. The total weight of each zooplankton was estimated by using an assimilation efficiency of 84% (Lockyer, 1981).

### Composition of prey species

The compositions of prey species in each area were calculated. Prey species that contributed less than five percent of the total weight of the forestomach contents were omitted from the analysis because the prey was clearly not a target species and their dietary energy was insignificant.

### Feeding Indices

The importance of each dominant prey species was evaluated by using the Combined Rank Index (CRI: Pitcher 1981). The CRI was calculated for each month, subarea and year.

First, we calculated the relative frequency of occurrence of each prey species (RF) as follows:

$$RF = (N_i / N_{\text{all}}) \times 100 \quad (1)$$

$N_i$  = the number of stomachs containing prey group  $i$   
 $N_{\text{all}}$  = the total number of stomachs analysed.

Then, the relative prey importance by weight of each prey species (RW) was calculated as follows:

$$RW = (W_i / W_{\text{all}}) \times 100 \quad (2)$$

$W_i$  = the weight of contents containing prey group  $i$   
 $W_{\text{all}}$  = the total weight of contents analysed.

The CRI was then calculated as follows:

$$CRI = \text{rank of RF} \times \text{rank of RW} \quad (3)$$

## Results

### Diversity of prey species

A total of sixteen prey species, including 1 copepod, 4 euphausiids, 1 squid, and 10 fishes were identified in

Table 2. Prey species found in the stomachs of minke whales sampled by the JARPN surveys between 1994 and 1999.

|          |                       |                                |
|----------|-----------------------|--------------------------------|
| Copepods |                       | <i>Neocalanus cristatus</i>    |
| Krill    |                       | <i>Euphausia pacifica</i>      |
|          |                       | <i>Thysanoessa inermis</i>     |
|          |                       | <i>T. inspinata</i>            |
|          |                       | <i>T. longipes</i>             |
| Squid    | Japanese common squid | <i>Todarodes pacificus</i>     |
| Pisces   | Pacific saury         | <i>Cololabis saira</i>         |
|          | Japanese anchovy      | <i>Engraulis japonicus</i>     |
|          | Japanese pilchard     | <i>Sardinops melanostictus</i> |
|          | Walleye pollock       | <i>Theragra chalcogramma</i>   |
|          | Chub mackerel         | <i>Scomber japonicus</i>       |
|          | Japanese pomfret      | <i>Brama japonica</i>          |
|          | Pink salmon           | <i>Oncorhynchus gorbuscha</i>  |
|          | Coho salmon           | <i>O. kisutch</i>              |
|          | Daggertooth           | <i>Anotopterus pharao</i>      |
|          | Japanese sand lance   | <i>Ammodytes hexapterus</i>    |

the 426 stomachs of minke whales (Table 2). In order to simplify the comparison of feeding indices the prey species were divided into the following prey groups: copepods, krill, squid, Japanese anchovy, Japanese pilchard, Pacific saury, walleye pollock, Chub mackerel, Japanese pomfret, Salmonidae and other fishes.

### Composition of prey species

Most minke whales (90.4%) had fed upon one single prey species, 8.5% had fed upon two species and only 1.2% had more than two prey species in the forestomach (Table 3).

### Geographical and seasonal changes in dominant prey species in the forestomach

#### *Pacific side of Japan*

In subareas 7, 8, and 9 Japanese anchovy was the dominant prey species, occurring in 43–100% of the stomach examined and composing 43–97% of the total weight ingested in May and June (Table 4A and 4B). In May minke whales consumed Japanese anchovy in the southern part of the research area (35°N–40°N) (Figure 2A), while in June minke whales consumed this species in the southern and middle part of the research area (35°N–45°N) (Figure 2B).

In July and August Pacific saury was the dominant prey species, occurring in 43–100% of the stomach contents examined and composing 43–94% of the total weight ingested (Table 4C and 4D). In July, minke whales consumed this species in the northern and middle part of the research area (Figure 2C). In August, they consumed this species mainly in the northern and middle part of the research area (Figure 2D).

In September krill was the dominant prey species, occurring in 50–54% of the stomach contents examined and composing 48–50% of the total weight ingested



Table 4. Geographical and temporal changes in stomach contents of 364 minke whales sampled by JARP survey between 1994 and 1999 in the Pacific side of Japan (subareas 7, 8 and 9).

| Prey species        | % Occurrence |            |           | % Weight ingested |            |           | CRI index |            |           |           |    |
|---------------------|--------------|------------|-----------|-------------------|------------|-----------|-----------|------------|-----------|-----------|----|
|                     | 7W<br>1998   | 7E<br>1998 | 8<br>1998 | 9<br>1997         | 7E<br>1998 | 8<br>1998 | 9<br>1997 | 7E<br>1998 | 8<br>1998 | 9<br>1997 |    |
| <b>A. May</b>       |              |            |           |                   |            |           |           |            |           |           |    |
| Euphausiacea        |              |            |           | 4.3               |            |           | 4.8       |            |           | 4         |    |
| Pisces              |              |            |           |                   |            |           |           |            |           |           |    |
| Japanese anchovy    |              | 97.7       | 100.0     | 95.7              |            | 96.8      | 91.2      | 1          | 1         | 1         |    |
| Pacific saury       |              | 4.5        | 12.5      | 4.3               |            | 3.0       | 3.2       | 4          | 4         | 6         |    |
| Salmonidae          |              |            |           |                   |            |           |           |            |           |           |    |
| Other fishes        |              |            |           |                   |            |           |           |            |           |           |    |
| No. whales observed |              | 44         | 8         | 23                |            | 44        | 8         | 23         | 44        | 8         | 23 |
| <b>B. June</b>      |              |            |           |                   |            |           |           |            |           |           |    |
| Euphausiacea        |              |            |           |                   |            |           |           |            |           |           |    |
| Pisces              |              |            |           |                   |            |           |           |            |           |           |    |
| Japanese anchovy    | 90.0         | 50.0       | 42.9      | 90.9              |            | 91.8      | 42.9      | 90.9       | 1         | 4         |    |
| Pacific saury       |              | 3.7        | 35.7      | 9.1               |            | 2.9       | 35.7      | 9.1        | 6         | 4         |    |
| Walleye pollock     | 12.0         |            |           |                   | 10.4       |           |           |            | 4         |           |    |
| Salmonidae          |              | 3.7        | 14.3      | 33                |            | 1.6       | 12.7      | 33         | 8         | 9         |    |
| No. whales observed | 50           | 2          | 27        | 14                | 33         | 50        | 2         | 27         | 14        | 33        |    |
| <b>C. July</b>      |              |            |           |                   |            |           |           |            |           |           |    |
| Euphausiacea        |              |            |           |                   |            |           |           |            |           |           |    |
| Copepoda            |              |            |           |                   |            |           |           |            |           |           |    |
| Pisces              |              |            |           |                   |            |           |           |            |           |           |    |
| Japanese anchovy    |              | 20.0       | 7.4       | 57.1              | 7.4        |           | 2.3       | 42.5       | 4         | 4         |    |
| Japanese pilchard   |              |            |           | 57.1              |            |           | 14.7      |            |           | 3         |    |
| Pacific saury       |              | 80.0       | 100.0     | 42.9              | 92.6       |           | 94.3      | 85.0       | 1         | 2         |    |
| Japanese pomfret    |              |            |           |                   | 1.9        |           |           | 0.4        |           | 36        |    |
| Salmonidae          |              |            | 7.4       |                   | 9.3        |           | 1.2       | 3.1        | 6         | 12        |    |
| Other fishes        |              |            |           |                   | 3.7        |           |           | 0.5        |           | 25        |    |
| No. whales observed | 1            | 10         | 27        | 7                 | 54         | 1         | 10        | 27         | 7         | 54        |    |



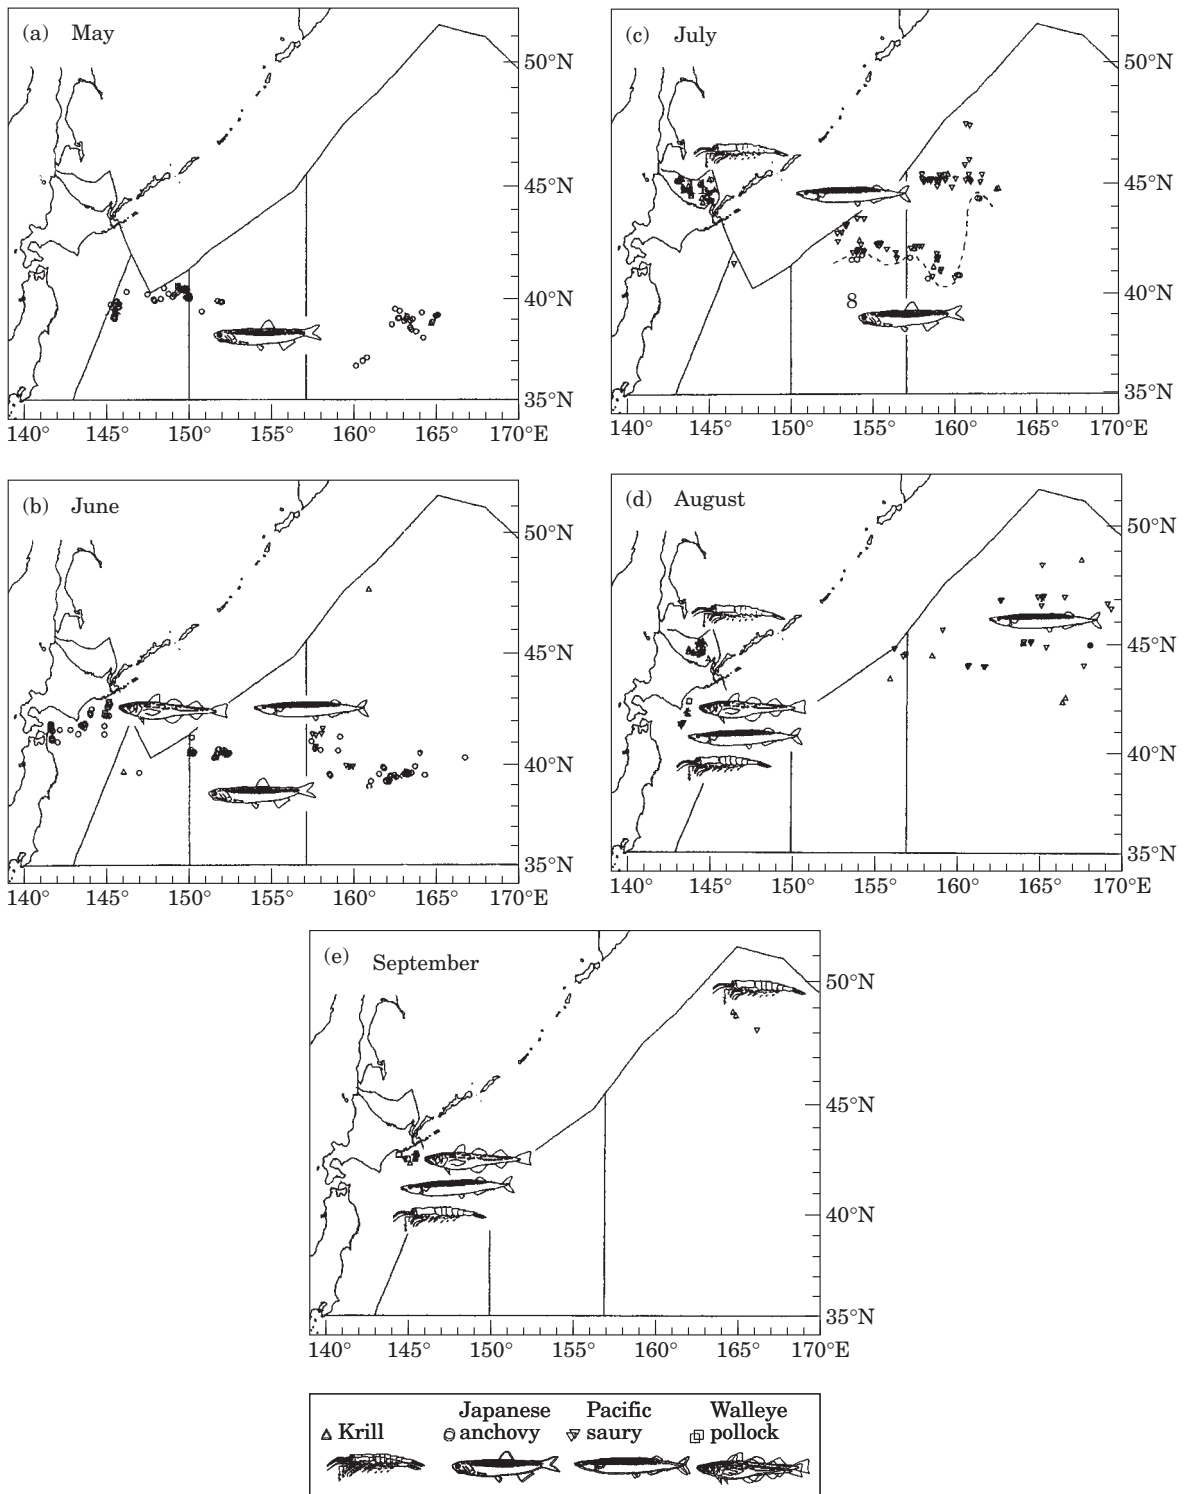

Figure 2. Temporal distribution of minke whales sampled and its dominant prey species.

Table 5. Temporal changes in the stomach contents of 62 minke whales sampled by JARPN surveys in 1996 and 1999 in the southern part of Okhotsk Sea (subarea 11).

| Prey species        | % Occurrence | % Weight ingested | CRI index |
|---------------------|--------------|-------------------|-----------|
| A. July (1999)      |              |                   |           |
| Euphausiacea        | 87.5         | 90.0              | 1         |
| Pisces              |              |                   |           |
| Japanese anchovy    | 12.5         | 10.0              | 4         |
| No. whales observed | 40           | 40                | 40        |
| B. August (1996)    |              |                   |           |
| Copepoda            | 0.09         | 0.01              | 4         |
| Euphausiacea        | 100.0        | 100.0             | 1         |
| No. whales observed | 22           | 22                | 22        |

(Table 4E). Minke whales consumed this species in the northern and middle part of the research area (Figure 2E).

Based on CRI value, the dominant prey species were Japanese anchovy during May and June and Pacific saury during July and August in subareas 7, 8, and 9. Krill was the dominant prey species in subareas 7W and 9 in September (Table 4).

#### Southern Okhotsk Sea

In subarea 11 krill was the dominant prey species, occurring in 88–100% of the stomach contents examined and composing 90–100% of the total weight ingested. In July minke whales consumed krill and Japanese anchovy while in August they consumed krill only (Figure 2D). Based on CRI value, krill were the dominant prey species in July and August (Table 5A and 5B).

#### Forklength frequency of dominant fishes ingested by minke whales

The forklength of Japanese anchovy ingested by minke whales ranged from 72 to 142 mm with a single mode at 120 mm (Figure 3A), except in June in subarea 9 and in July in subarea 8.

The forklength of Pacific saury ranged from 149 to 330 mm in subarea 9 and from 160 to 340 mm in subareas 7 and 8. There was a tendency towards finding larger Pacific saury in the offshore subarea (subarea 9) as compared to inshore subareas (subareas 7 and 8) (Figure 3B).

The forklength of walleye pollock in June ranged from 310 to 412 mm with a single mode at 371 mm and in September ranged from 360 to 530 mm with a mode at 437 mm (Figure 3C).

## Discussion

### Prey species and feeding type

The prey species of minke whales in the western North Pacific and southern Okhotsk Sea during May and

September from 1994 to 1999 comprised various pelagic prey species of zooplankton, squid and fishes and varied both geographically and temporally. In the Northern Hemisphere, minke whales consume various pelagic prey species of zooplankton, squid and fishes (Kasamatsu and Tanaka, 1992; Haug *et al.*, 1995, 1996; Tamura, 1998; Tamura *et al.*, 1998), while in the Southern Hemisphere they consume krill (*Euphausia superba*) (Ichii and Kato, 1991; Tamura, 1998). We confirmed that minke whales in the western North Pacific are euryphagous, similar to those in Northeast Atlantic and unlike the stenophagous type found in the Antarctic.

Generally, the baleen whales are grouped into two types by their feeding behaviour, swallowing and skimming (Nemoto, 1959). The former is the group of fin whales, blue whale and humpback whale and the latter is the group of the right whale. Most minke whales had fed upon one single prey species. In each subarea only a few whales had two prey species or more in their stomachs. Judging from these results, minke whale in the western North Pacific is also confirmed to be of the swallowing type. They feed on swarming zooplankton and schooling fish, indicating an ability to pursue single-prey species aggregations.

### Geographical and seasonal changes in prey species

On the Pacific side of Japan the dominant prey species was Japanese anchovy during May and June, Pacific saury during July and August and krill in September. In the southern Okhotsk Sea, krill was the dominant prey species in July and August.

In the daytime, Pacific saury is mainly distributed at 10 to 15 m depths where it feeds on copepods and krill (Hotta and Odate, 1956; Wada and Kitakata, 1982). Japanese anchovy is also distributed shallower than 30 m depth, where it feeds on copepods (Kondo, 1969). These two fishes are distributed widely in temperate waters of the western North Pacific. Pacific saury and Japanese anchovy migrate to the area to feed copepod and krill from June through September (Kondo, 1969; Odate, 1977). Minke whales might feed on those at the surface during their seasonal migration to high latitudes. Differences in the CRI between Pacific saury and Japanese anchovy might reflect the local changes in the relative abundance of these species in the area.

In subarea 7W walleye pollock was also an important prey species during June and September. Walleye pollock is separated into surface groups (coastal waters, over continental shelf) and deeper water groups (100–300 m) after spawning (Maeda *et al.*, 1988). Minke whales probably feed on the surface groups because they are important prey species in coastal waters over the continental shelf.



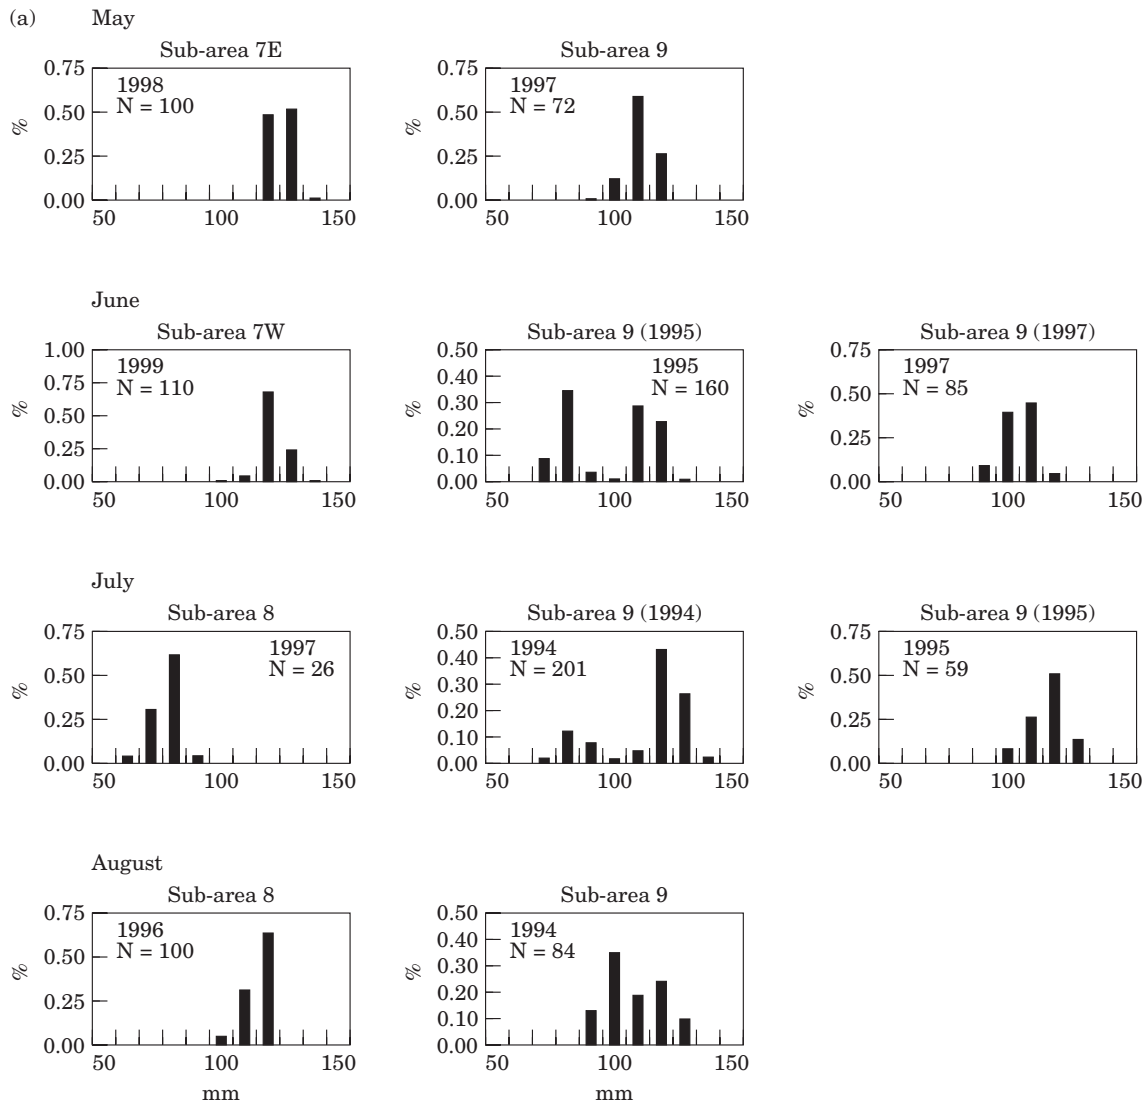

Figure 3. (a).

Unfortunately, our results are insufficient to clarify the feeding ecology of the western North Pacific minke whales because the research areas did not fully cover their distribution of in summer. In the northern and middle Okhotsk Sea (subarea 12), in particular, adult females are found but their prey species are still unknown. More surveys are needed in this area.

Furthermore, our sampling “seasons” did not fully cover the distribution because of the lack of availability of the research fleet. Minke whales in the Northwestern Pacific feed on prey from March to October (Kasamatsu and Tanaka, 1992). In addition, many balaenopterid whales such as fin whales, humpback whales have a cycle of feeding and breeding. In the North Atlantic, the feeding periods of fin whales and minke whales are from

spring to autumn (Folkow *et al.*, 2000). Further research is needed to cover the spring to autumn period in the North Pacific.

#### Yearly changes of prey species

Kasamatsu and Hata (1985) reported that Chub mackerel was the most important prey species of minke whales in the Western Pacific (northern part of subarea 8) in August, and walleye pollock was the most important one for minke whales in east Sakhalin (part of subarea 12) between June and August from test whaling between 1973 and 1975. Kasamatsu and Tanaka (1992) examined annual changes in prey species based on catch

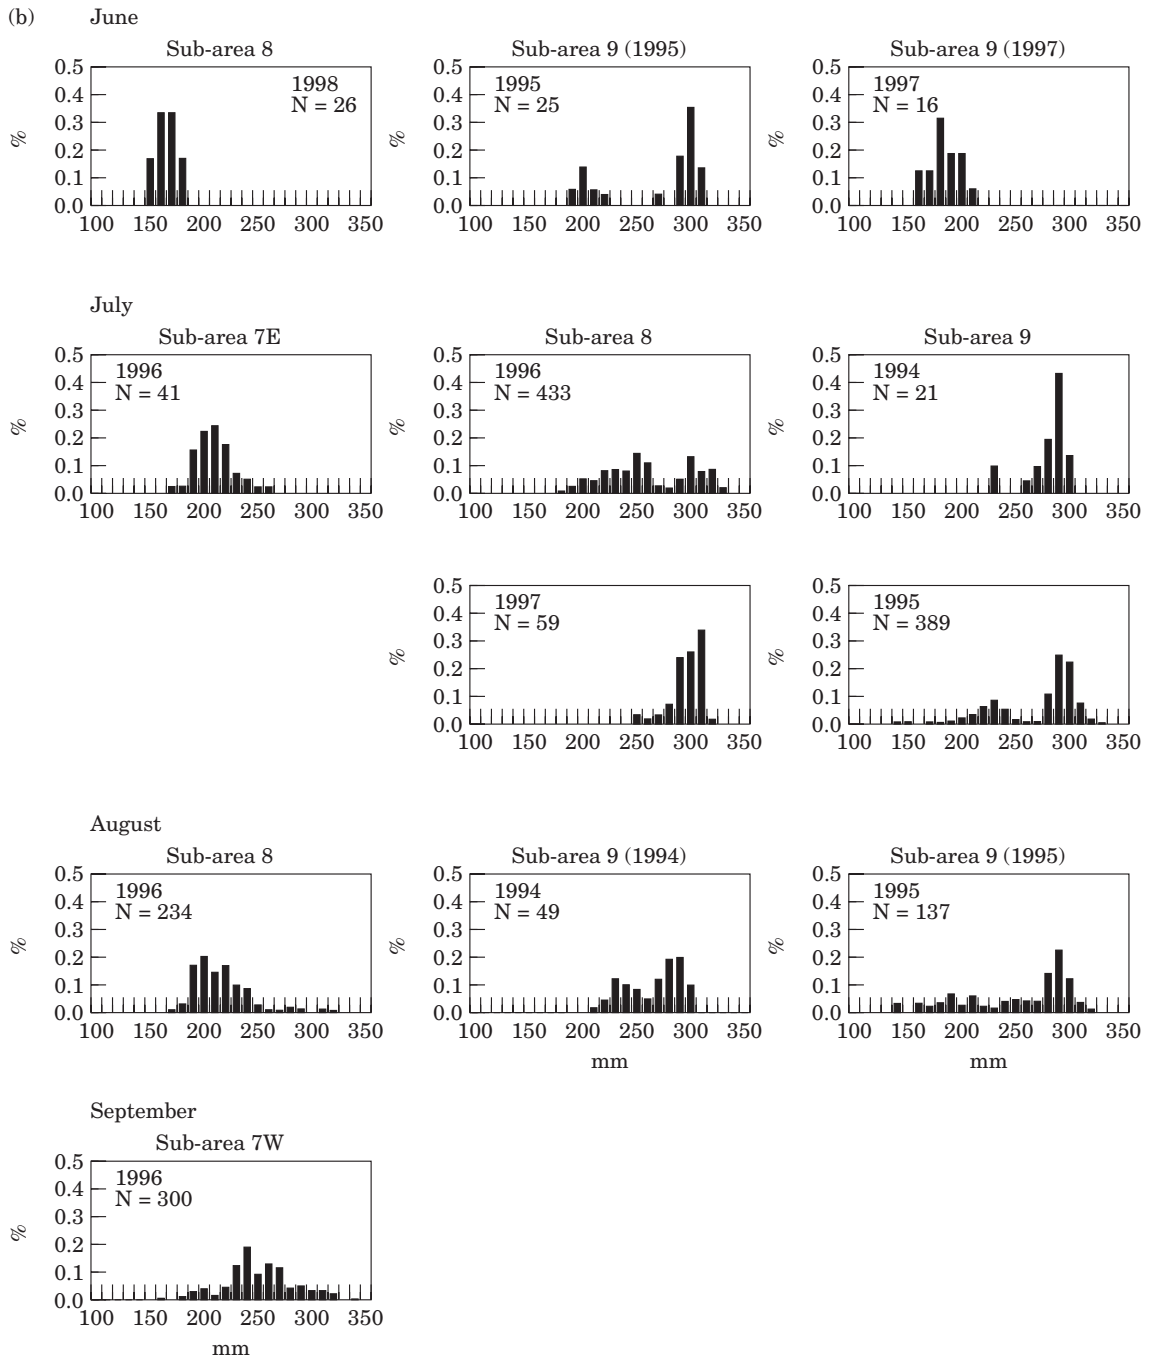

Figure 3. (b).

records of small operations in the seven whaling grounds off Japan from 1948 to 1987. On the Pacific coast of Hokkaido (part of subarea 7W) from April to October, prey species recorded were krill, squid, Japanese pilchard, Japanese anchovy, Chub mackerel, walleye pollock, cod, sand lance, Pacific saury etc. They noted

that the change of prey of minke whales from Chub mackerel to Japanese pilchard in 1977 corresponded with a change of the dominant species taken by the commercial fisheries in the same area in 1976. They also reported that krill was the dominant prey species from 1964 to 1987 in the Okhotsk Sea.

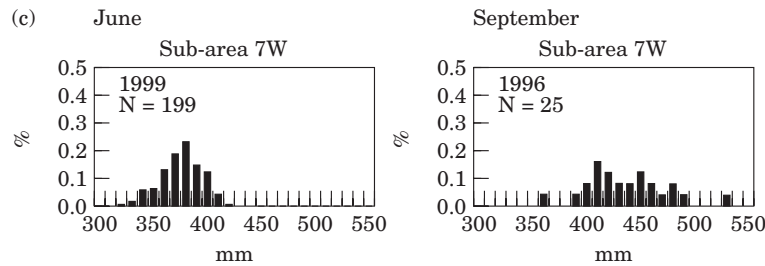

Figure 3. (c).

Figure 3. Forklength frequency of (a) Japanese anchovy, (b) Pacific saury and (c) walleye pollock consumed by minke whales in the western North Pacific.

The yearly change of prey species in subarea 7W (Pacific coast of Hokkaido) was examined also. Figure 4 shows the relative frequency of occurrence of each dominant prey species and the catch data for Japanese pilchard, Chub mackerel and Pacific saury. The change of prey species of minke whales from Chub mackerel to

Japanese pilchard in 1977, from Japanese pilchard to Pacific saury in 1996 corresponded with a change of the dominant species taken by commercial fisheries in the same area in 1976, 1996, respectively.

Because it is reasonable to assume that minke whales do not have a strong preference for a particular prey species (Jonsgård, 1982; Kasamatsu and Tanaka, 1992), changes in prey composition probably reflect changes in the abundance of available prey species. Unfortunately, knowledge of the historical change of abundance of these prey species in the western North Pacific and Okhotsk Sea is insufficient to examine this relationship. The length distributions indicate that minke whales fed primarily on the adult stage of Japanese anchovy (Kondo, 1969), Pacific saury (Odate, 1977) and walleye pollock (Maeda *et al.*, 1972). These fish support important commercial fisheries.

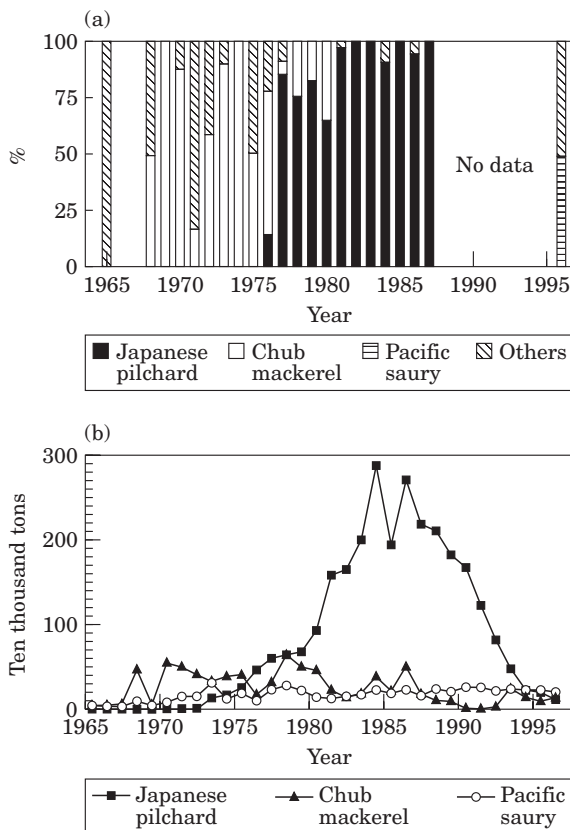

Figure 4. The annual change of relative frequency of occurrence of each dominant prey species consumed by minke whale in subarea 7W (a) and the commercial catch on the Pacific side (b). (The Ministry of Agriculture, Forestry and Fisheries of Japan, 1967–1999; Kasamatsu and Tanaka, 1992; this study).

#### Competition between minke whales and fisheries

In recent years increased attention has been paid to interactions between commercial fisheries and whales. For example, consumption of Atlantic herring *Clupea harengus* by minke whales is estimated to be 633 000 tons per year in a part of the Northeast Atlantic. This is more than half the total Norwegian catch of herring (Folkow *et al.*, 2000).

Figure 5 shows the fishing grounds of Pacific saury and the positions of minke whales sightings in subarea 7W in the survey conducted between 24 August and 5 September 1996 (Fujise *et al.*, 1997). Most sightings occurred close to the fishing grounds. This observation suggests a relationship between minke whales and Pacific saury from summer to autumn in the western North Pacific.

Unfortunately, knowledge of the abundance of these prey species and minke whales in the western North Pacific and southern Okhotsk Sea from spring to autumn is insufficient to examine this relationship. Therefore, more data are urgently needed on seasonal, local and annual variations in both the prey and minke whales before conclusions can be drawn with regard to

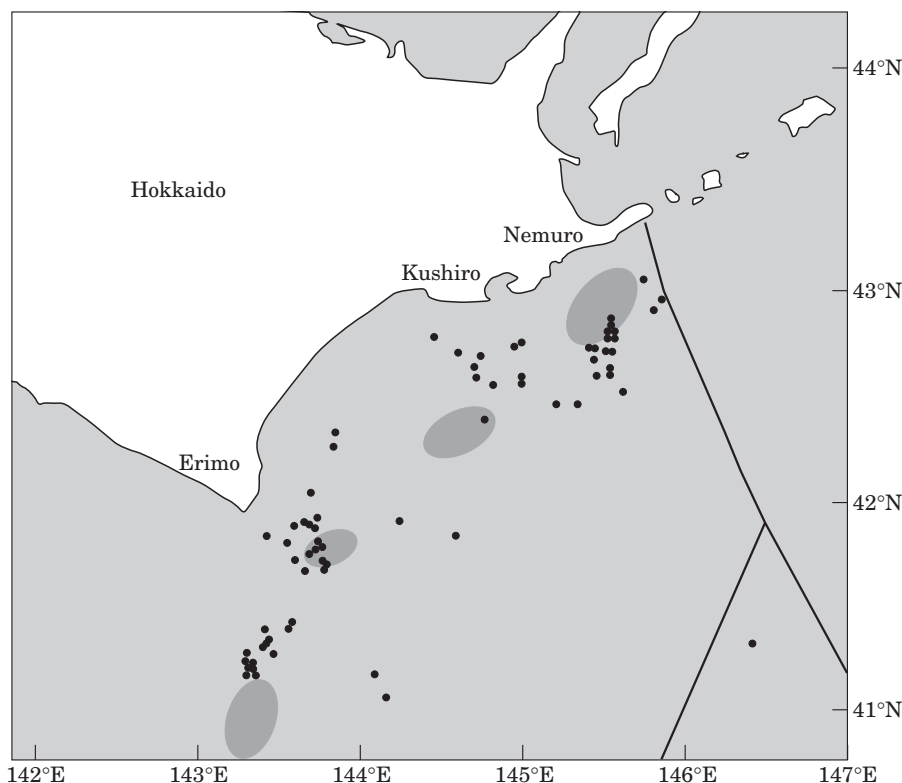

Figure 5. The relationship between minke whale sightings (dot) and the fishing grounds (shaded areas) of Pacific saury in subarea 7W during 22 July and 8 September 1996. The information was obtained from telexes 27–33 relating to the fishing grounds off the Pacific coast of eastern Hokkaido supplied to the Fishing Information Service Centre in Japan (redrawn from Fujise *et al.*, 1997).

their role in the marine ecosystems of the Northwestern Pacific.

## Acknowledgements

We are indebted to R. Zenitani, H. Isikawa, M. Goto, T. Bando and S. Otani of the Institute of Cetacean Research (ICR) who collected the data and samples of stomach contents during the JARPN surveys from 1994 to 1999. We would also like to thank the Captain, crews and researchers, who were involved in the surveys. Our sincere thanks to Prof. T. Haug of the Norwegian Institute of Fisheries and Aquaculture, Dr H. Hatanaka of the National Research Institute of Fisheries Science, Dr S. Ohsumi, Director General of the Institute of Cetacean Research and Dr Luis A. Pastene of that Institute for their valuable suggestions and useful comments on this paper.

## References

- Arai, M. 1993. Usujiri shyuhenkaiiki ni seisokusuru gyorui no jiseki no hikakukeitaigakuteki kenkyuu [Comparative study on morphological otoliths for several fishes of Usujiri and adjacent waters in Southern Hokkaido, Japan]. Graduation Thesis, Hokkaido University, 98 pp. [In Japanese].
- Baker, A. de C., Boden, B. P., and Brinton, E. 1990. A practical guide to the euphausiids of the world. Natural History Museum Publications, London. 96 pp.
- Brodskii, K. A. 1950. Calanoida of the far eastern seas and polar basin of the USSR. *Opred. Faune SSSR*, 35: 1–442. [In Russian] (Transl: Israel Program for Scientific Translations, Jerusalem 1967).
- Buckland, S. T., Cattanch, K. L., and Miyashita, T. 1992. Minke whale abundance in the northwest Pacific and the Okhotsk Sea, estimated from 1989 and 1990 sighting surveys. *Report of the International Whaling Commission*, 42: 387–392.
- Chihara, M., and Murano, M. (eds) 1997. An illustrated guide to marine plankton in Japan. Tokai University Press, Tokyo, Japan. 1574 pp.
- Folkow, L. P., Haug, T., Nilsen, K. T., and Nordøy, E. S. 2000. Estimated food consumption of minke whales *Balaenoptera acutorostrata* in Northeast Atlantic waters in 1992–1995. *NAMMCO Sci. Publ.*, 2: 65–80.
- Fujise, Y., Shimada, H., Zenitani, R., Goto, M., Matsuoka, K., Tamura, T., Lindstrøm, U., Uchida, A., Yoshida, H., Shimamoto, K., Yuzu, S., Kasai, H., Kinoshita, T., Iwata, T., and Tohyama, D. 1997. Cruise report of the Japanese whale research program under a special permit in the North Pacific (JARPN) in 1996 with some preliminary analyses of data collected during the 1994–1996 JARPN surveys. *International Whaling Commission SC/49/NP*, 8: 38.

- Haug, T., Gjørseter, H., Lindstrøm, U., and Nilssen, K. T. 1995. Diets and food availability for northeast Atlantic minke whale *Balaenoptera acutorostrata* during summer 1992. ICES Journal of Marine Science, 52: 77–86.
- Haug, T., Lindstrøm, U., Nilssen, K. T., Rottingen, I., and Skaug, H. J. 1996. Diet and food availability for Northeast Atlantic minke whales *Balaenoptera acutorostrata*. Report of the International Whaling Commission, 46: 371–382.
- Hosokawa, H., and Kamiya, T. 1971. Some observations on the cetacean stomachs, with special considerations on the feeding habits of whales. The Scientific Reports of the Whales Research Institute, 23: 91–101.
- Hotta, H., and Odate, K. 1956. The food and feeding habit of the saury, *Cololabis saira*. Bulletin Tohoku Region Fishery Research Laboratory, 7: 60–69.
- Ichii, T., and Kato, H. 1991. Food and daily food consumption of southern minke whales in the Antarctic. Polar Biology, 11: 479–487.
- International Whaling Commission 1983. Report of the Subcommittee on minke whales. Report of the International Whaling Commission, 33: 91–122.
- International Whaling Commission 1994. Report of the Working Group on North Pacific minke whale management trials. Report of the International Whaling Commission, 44: 120–144.
- Jonsgård, Å. 1982. The food of minke whale (*Balaenoptera acutorostrata*) in northern North Atlantic waters. Report of the International Whaling Commission, 32: 259–262.
- Kasamatsu, F., and Hata, T. 1985. Notes on minke whales in the Okhotsk Sea–West Pacific area. Report of the International Whaling Commission, 35: 299–304.
- Kasamatsu, F., and Tanaka, S. 1992. Annual changes in prey species of minke whales taken off Japan 1948–87. Nippon Suisan Gakkaishi, 58: 637–651.
- Kato, H., Hiroyama, H., Fujise, Y., and Ono, K. 1989. Preliminary report of the 1987/88 Japanese feasibility study of the special permit proposal for Southern Hemisphere minke whales. Report of the International Whaling Commission, 39: 235–248.
- Kondo, K. 1969. Ecological studies of life pattern of the Japanese anchovy, *Engraulis japonicus* (HOULTUYN). Bulletin Tokai Region Fishery Research Laboratory, 60: 29–81.
- Kubodera, T., and Furuhashi, M. 1987. Inaiyoubutu tyuuno ikarui oyobi hadakaiwasikagyorui no syusateinikannsuru manyuaru [Guide to the identification of lantern fishes and cephalopods in the stomach contents]. Appendix document of the report on the modeling of ecosystem in northern North Pacific. Fisheries Agency of Japan, 65 pp. [In Japanese].
- Lindstrøm, U., Haug, T., and Nilssen, K. T. 1997. Diet studies based on contents from two separate stomach content compartments of northeast Atlantic minke whales *Balaenoptera acutorostrata*. Sarsia, 82: 63–68.
- Lockyer, C. 1981. Growth and energy budgets of large baleen whales from the Southern Hemisphere. FAO Fish. Ser. (5) [Mammals in the Sea], 3: 379–487.
- Maeda, T., Nakatani, T., Takahashi, T., and Takagi, S. 1988. Distribution and migration of adult walleye pollock off Hiyama, southwestern Hokkaido. Proceedings of the International Symposium Biology and Management of Walleye pollock, 325–347.
- Masuda, H., Amaoka, K., Araga, C., Uyeno, T., and Yoshino, T. (eds) 1988. The fishes of the Japanese archipelago. Second edition. Tokai University Press, Tokyo, Japan. 378 pp.
- Morrow, J. E. 1979. Preliminary keys to otoliths of some adult fishes of the gulf of Alaska, Bering Sea, and Beaufort Sea. NOAA Technical Report NMFS circular, 420: 32 pp.
- Nemoto, T. 1959. Food of baleen whales with reference to whale movements. The Scientific Reports of the Whales Research Institute, 14: 149–290.
- Odate, S. 1977. On the distribution of Pacific saury in the North Pacific Ocean. Research Institute of North Pacific Fisheries, Faculty of Fisheries, Hokkaido University, Special vol: 353–381.
- Ohe, F. 1984. Otoliths of the coastal fishes along Japanese Islands and of fishes of adjacent seas. Report of Bullten The senior High School attached to Aichi University of Education, 11: 183–220.
- Olsen, M. A., Nordøy, E. S., Blix, A. S., and Mathiesen, S. D. 1994. Functional anatomy of the gastrointestinal system of Northeastern Atlantic minke whales (*Balaenoptera acutorostrata*). Journal of Zoology, London, 234: 55–74.
- Omura, H., and Sakiura, H. 1956. Studies on the little piked whale from the Coast of Japan. The Scientific Reports of the Whales Research Institute, 11: 1–37.
- Pitcher, K. W. 1981. Prey of the Steller sea lion, *Eumetopias jubatus*, in the Gulf of Alaska. Fishery Bulletin, 79: 467–472.
- Tamura, T. 1998. The study of feeding ecology of minke whales in the Northwest Pacific and Antarctic. D.C. thesis. Hokkaido University. 125 pp. [In Japanese].
- Tamura, T., Fujise, Y., and Shimazaki, K. 1998. Diet of minke whales *Balaenoptera acutorostrata* in the Northwestern part of the North Pacific in summer, 1994 and 1995. Fisheries Science, 64(1): 71–76.
- Tomilin, A. G. 1967. Mammals of the USSR and Adjacent Countries. Cetacea. 9. Israel Prog. Sci., Jerusalem, 1967: 717 [translation].
- The Minster of Agriculture, Forestry and Fisheries of Japan 1967–1999. Gyogyo-yousyokugyousei seiantoukei nenpou. [In Japanese].
- Wada, T., and Kitakata, M. 1982. Sampling research with mid-water drift gillnet and behavior of saury in the daytime. Bulletin Hokkaido Region Fishery Research Laboratory, 47: 11–22.
- Zhongxue, L., Hanguang, X., Shulin, J., and Wenxiang, H. 1983. Studies on the minke whale from the northern Yellow Sea. Acta. Zoologica. sinica., 29: 86–92. [In Chinese].
